# Supplementary material
Source: publisher figshare collection journal article supplement (https://karger.figshare.com/ndownloader/files/14659175)
Supplement: Supplementary file 1 [file 14659175]

## **Suppl. Appendix 1**

### **Search strategies**

#### ***Medline search strategy***

1 exp Acute Kidney Injury/

2 ((acute) adj3 (renal or kidney) adj3 (insufficienc\* or injur\* or failur\*)).mp.

3 (acute adj3 dialys\*).mp

4 (acute adj3 renal replac\*).mp

5 Aki.ti,ab

6 Arf.ti,ab

7 Recurrence/

8 (recurr\* or repeat or re-occur\* or re occur\*).mp.

9 1 or 2 or 3 or 4 or 5 or 6 (68898)

10 7 or 8 (803145)

11 9 and 10 (1768)

12 prognos\*.mp

13 predict\*.mp

14 course\*.mp

15 outcome\*.mp

16 recover\*.mp

17 (follow-up or follow up or follow\*up).mp

18 ((regression or predict\* or multivariable) adj (analys\* or model\*)).mp.

19 exp Cohort Studies/

20 ((longitudinal or retrospective or prospective or cross sectional or cohort or randomi\*ed) adj (study or studies or review or analys\* or cohort\*)).mp.

21 ((validat\* or rule\* or scor\* or risk or decision or clinical) adj5 (model\*)).mp.

22 12 or 13 or 14 or 15 or 16 or 17 or 18 or 19 or 20 or 21 (6269282)

23 11 and 22 (1036)

24 (exp animal/ or nonhuman/) not exp human/

25 23 not 24 (1025)

26 limit 25 to (english language and “all adult (19 plus years)”) (558)

## Risk of recurrent acute kidney injury

### ***EMBASE search strategy***

- 1 exp acute kidney failure/
- 2 (acute) adj3 (renal or kidney) adj3 (insufficienc\* or injur\* or failur\*).mp.
- 3 (acute adj3 dialys\*).mp
- 4 (acute adj3 renal replac\*).mp
- 5 Aki.ti,ab
- 6 Arf.ti,ab
- 7 recurrent disease/
- 8 recurrent disease.mp.
- 9 (recurr\* or repeat or re-occur\* or re occur\*).mp.
- 10 1 or 2 or 3 or 4 or 5 or 6
- 11 7 or 8 or 9
- 12 10 and 11
- 13 prognos\*.mp
- 14 predict\*.mp
- 15 course\*.mp
- 16 outcome\*.mp
- 17 recover\*.mp
- 18 (follow-up or follow up or follow\*up).mp
- 19 ((regression or predict\* or multivariable) adj (analys\* or model\*)).mp.
- 20 ((longitudinal or retrospective or prospective or cross sectional or cohort or randomi\*ed) adj (study or studies or review or analys\* or cohort\*)).mp.
- 21 ((validat\* or rule\* or scor\* or risk or decision or clinical) adj5 (model\*)).mp.
- 22 13 or 14 or 15 or 16 or 17 or 18 or 19 or 20 or 21
- 23 12 and 22
- 24 (exp animal/ or nonhuman/) not exp human/
- 25 23 not 24
- 26 limit 25 to (english language and adult <18 to 64 years>)

### **CINAHL (EBSCO host) search strategy**

- S1 ((acute) N3 (renal or kidney) N3 (insufficienc\* or injur\* or failur\*))
- S2 (recurr\* or repeat or re-occur\* or re occur\*)

## Risk of recurrent acute kidney injury

S3 ((MM "Models, Statistical") or TI ((predict\* or validat\* or rule\* or scor\*) or ((predict\* or multicomponent or multivariable) N3 model\*) or (predict\* N3 (outcome\* or risk\* or model\*)) or ((history or variable\* or criteria or scor\* or characteristic\* or finding\* or factor\* or value\*) N3 (predict\* or model\* or decision\* or identif\* or prognos\*)) or (decision\* N3 (model\* or clinical\* or logistic model\*)) or (prognostic N3 (history or variable\* or criteria or scor\* or characteristic\* or finding\* or factor\* or model\*)) or (observ\* N3 (variation or model\*))) or AB ((predict\* or validat\* or rule\* or scor\*) or ((predict\* or multicomponent or multivariable) N3 model\*) or (predict\* N3 (outcome\* or risk\* or model\*)) or ((history or variable\* or criteria or scor\* or characteristic\* or finding\* or factor\* or value\*) N3 (predict\* or model\* or decision\* or identif\* or prognos\*)) or (decision\* N3 (model\* or clinical\* or logistic model\*)) or (prognostic N3 (history or variable\* or criteria or scor\* or characteristic\* or finding\* or factor\* or model\*)) or (observ\* N3 (variation or model\*))))

S4 S1 AND S2 AND S3

## Cochrane library search strategy

#1 (acute) near (renal or kidney) near (insufficienc\* or injur\* or failur\*)

#2 (recurr\* or repeat or re-occur\* or re occur\*)

#3 MeSH descriptor: [Models, Statistical] explode all trees

#4 (((predict\* or multicomponent or multivariable) near model\*) or (predict\* near (outcome\* or risk\* or model\*)) or ((history or variable\* or criteria or scor\* or characteristic\* or finding\* or factor\* or value\*) near (predict\* or model\* or decision\* or identif\* or prognos\*)) or (decision\* near (model\* or clinical\* or logistic model\*)) or (prognostic near (history or variable\* or criteria or scor\* or characteristic\* or finding\* or factor\* or model\*)) or (observ\* near (variation or model\*)))

#5 #3 or #4

#6 #1 and #2 and #5

## Web of Science

#1 TS= (acute kidney injur\* OR acute renal injur\* OR acute kidney failure\* OR acute renal failure\* OR acute kidney insufficienc\*)

#2 TS= (recurr\* or repeat or re-occur\* or re occur\*)

#3 TS= (predict\* or prognos\* or course or outcome\* or multicomponent or multivariable or risk or factor\*)

#4 #1 and #2 and #3

**Suppl. Table S1a. Characteristics of included studies on AKI recurrence within the same hospital admission**

| <b>Publication Year</b> | <b>Author</b>  | <b>Country</b> | <b>Aims</b>                                                                                                                                                  | <b>Study design</b>                              | <b>Population</b>                                                          | <b>N with initial AKI</b> | <b>N with r-AKI</b> | <b>AKI definition</b>                                                                                                        | <b>Recurrence definition</b>                                                                                                                                                                   |
|-------------------------|----------------|----------------|--------------------------------------------------------------------------------------------------------------------------------------------------------------|--------------------------------------------------|----------------------------------------------------------------------------|---------------------------|---------------------|------------------------------------------------------------------------------------------------------------------------------|------------------------------------------------------------------------------------------------------------------------------------------------------------------------------------------------|
| 2014                    | Harris et al.  | USA            | To assess AKI recurrence after recovery from initial AKI in critically ill patients + risk factors of AKI recurrence                                         | Retrospective cohort study                       | Critically ill patients (admitted to non-cardiac, non-trauma surgical ICU) | 296                       | 68                  | RIFLE creatinine criteria                                                                                                    | Any subsequent renal event (following AKI recovery) during the index admission. Recurrent AKI defined as a $\geq 1.5$ fold increase in creatinine following recovery from previous AKI episode |
| 2015                    | Warnock et al. | USA            | To categorize hospital acquired-AKI based on the timing of minimum and peak inpatient serum creatinine and describe the association with inpatient mortality | Retrospective analysis of an administrative data | Adults admitted to a medical centre over 4 years                           | 18,348                    | 2,243               | Acute Kidney Injury Network (AKIN) serum criteria (an increase of $\pm 0.3$ mg/dL between peak and minimum serum creatinine) | Transient hospital-acquired AKI patients who recovered and then developed hospital-acquired AKI during an admission. AKI was defined as an increase of 0.3mg/dL from baseline creatinine       |

# Risk of recurrent acute kidney injury

|      |               |       |                                                                                                                                                            |                            |                                             |        |       |                                                                                                       |                                                                                                                                                                                                                                         |
|------|---------------|-------|------------------------------------------------------------------------------------------------------------------------------------------------------------|----------------------------|---------------------------------------------|--------|-------|-------------------------------------------------------------------------------------------------------|-----------------------------------------------------------------------------------------------------------------------------------------------------------------------------------------------------------------------------------------|
| 2016 | Kellum et al  | USA   | To assess different patterns of AKI reversal in critically ill patients + how they relate to recovery and post discharge outcomes                          | Retrospective cohort study | Patients admitted to ICU                    | 16,968 | 6,322 | KDIGO (Kidney Disease Improving Global Outcomes) criteria serum creatinine and urine output criteria. | Relapse occurring during hospital admission that may not resolve before hospital discharge. Recurrent AKI defined as an increase of $\geq 1.5$ fold creatinine following recovery or presence of oliguria (urine output $< 5$ ml/kg/hr) |
| 2017 | Rodrigo et al | Spain | To explore rate and consequences of AKI recurrence in patients admitted to ICU with severe sepsis. To compare outcomes of recurrent AKI with no AKI, 1 AKI | Prospective cohort study   | Patients admitted to ICU with severe sepsis | 331    | 79    | KDIGO serum creatinine criteria                                                                       | $\geq 2$ AKI episodes during ICU stay. Recurrent AKI defined as a new spontaneous rise of $\geq 0.3$ mg/dl within 48 hours from the lowest serum creatinine after the previous AKI episode                                              |

**Suppl. Table S1b. Characteristics of included studies on post-discharge AKI recurrence**

| <b>Publication Year</b> | <b>Author</b> | <b>Country</b> | <b>Aims</b>                                                                                                                                                  | <b>Study design</b>        | <b>Population</b>                                                          | <b>N with initial AKI</b> | <b>N with r-AKI</b> | <b>Duration of follow up</b>   | <b>AKI definition</b>                                                                                            | <b>Recurrence definition</b>                                                                                                                                                    |
|-------------------------|---------------|----------------|--------------------------------------------------------------------------------------------------------------------------------------------------------------|----------------------------|----------------------------------------------------------------------------|---------------------------|---------------------|--------------------------------|------------------------------------------------------------------------------------------------------------------|---------------------------------------------------------------------------------------------------------------------------------------------------------------------------------|
| 2011                    | Thakar et al  | USA            | To examine the effects of AKI episodes during multiple hospitalizations on the risk of chronic kidney disease (CKD) in a cohort with diabetes mellitus (DM). | Retrospective cohort study | Patients with diabetes mellitus                                            | 530                       | 157                 | 10 years (median: 62.3 months) | AKIN creatinine criteria: a 0.3 mg/dl or a 1.5-fold increase in creatinine relative to admission                 | Additional AKI episodes following index AKI in hospital. AKI was defined as $\geq 1.5$ fold increase in creatinine relative to the admission creatinine for the hospitalisation |
| 2014                    | Xie           | Canada         | To assess factors associated with outpatient nephrology follow-up after the development of AKI on patients who had a nephrology in-hospital consultation     | Retrospective cohort study | Patients who had a nephrology in-hospital consultation and were discharged | 170                       | 70                  | 4 years (median: 19 months)    | KDIGO serum creatinine criteria: an increase in serum creatinine $>0.3$ mg/dl within 2 days or 50% within 7 days | Recurrent AKI post discharge in AKI patients with nephrology inpatient consultation. AKI was defined as $\geq 2$ fold increase in serum creatinine within 48 hours              |

Risk of recurrent acute kidney injury

|      |             |     |                                                                                                                                                                                                     |                            |                                                                                           |        |       |        |                                                                |                                                                                                                                                                                                                                                                                                                                                                                |
|------|-------------|-----|-----------------------------------------------------------------------------------------------------------------------------------------------------------------------------------------------------|----------------------------|-------------------------------------------------------------------------------------------|--------|-------|--------|----------------------------------------------------------------|--------------------------------------------------------------------------------------------------------------------------------------------------------------------------------------------------------------------------------------------------------------------------------------------------------------------------------------------------------------------------------|
| 2016 | Siew et al  | USA | To explore risk factors for recurrent AKI present during index hospitalisations and how this relates to hospitalisation with recurrent AKI within 12 months of discharge from index hospitalisation | Retrospective cohort study | Patients hospitalised for at least 24 hours, where hospitalisation was complicated by AKI | 11,683 | 2,954 | 1 year | a 0.3 mg/dl or 50% increase from a baseline creatinine measure | Hospitalization with recurrent AKI within 12 months of discharge from the index hospitalization. Recurrent AKI was defined as defined as a 0.3 mg/dl or 50% increase in serum creatinine from the lowest of either the most recent serum creatinine beginning at discharge from the index AKI hospitalization or the admission creatinine of the recurrent AKI hospitalization |
| 2017 | Valle et al | USA | To assess incidence of percutaneous coronary intervention associated AKI (PCI-AKI) + outcomes post PCI-AKI                                                                                          | Retrospective cohort study | Patients undergoing PCI                                                                   | 39,850 | 5,365 | 1 year | AKIN serum creatinine criteria                                 | Recurrent renal injury after hospital discharge in patients with post-PCI AKI (defined as >0.4 mg/dL or $\geq 1.5$ fold increase in serum creatinine from creatinine after previous AKI episode)                                                                                                                                                                               |

Risk of recurrent acute kidney injury

|      |                 |       |                                                                                                                                 |                                                 |                                                                                   |     |     |                  |                                                                                                                                                                                         |                                                                                                                                                                                          |
|------|-----------------|-------|---------------------------------------------------------------------------------------------------------------------------------|-------------------------------------------------|-----------------------------------------------------------------------------------|-----|-----|------------------|-----------------------------------------------------------------------------------------------------------------------------------------------------------------------------------------|------------------------------------------------------------------------------------------------------------------------------------------------------------------------------------------|
| 2017 | Horne et al.    | UK    | To characterise the effect of acute kidney injury (AKI) on long-term changes in renal function in a general hospital population | Prospective matched parallel group cohort study | Hospitalised patients (with or without AKI)                                       | 194 | 64  | 3 years          | AKIN serum creatinine and urine output criteria                                                                                                                                         | Not clear, though follow up was 3 years (suggesting AKI after discharge). AKI defined based on AKIN criteria                                                                             |
| 2018 | Rodriguez et al | Spain | To determine the impact of repeated AKI episodes in renal outcomes during 4 years follow-up                                     | Retrospective cohort study                      | Patients with an AKI diagnosis in hospital who recovered fully prior to discharge | 359 | 122 | 4 years (median) | Acute Dialysis Quality Initiative criteria: increase in SCr by $\geq 0.3$ mg/dl ( $\geq 26.5$ mmol/L) within 48 hours; or increase in SCr to $\geq 1.5$ times baseline serum creatinine | Recurrent AKI after discharge from initial AKI hospital admission. AKI was defined as an increase in serum creatinine of 0.3mg/dl within 48 hours or up to 1.5 times baseline creatinine |



**Suppl. Table S2. Quality assessment of studies by domain using Newcastle-Ottawa scale.**

|                       | Representativeness of exposed cohort | Selection of the non-exposed cohort | Ascertainment of exposure | Demonstration that outcome of interest was not present at start of study | Comparability of cohorts on the basis of the design or analysis | Assessment of Outcome | Was follow up long enough for outcomes to occur | Adequacy of follow up of cohorts |
|-----------------------|--------------------------------------|-------------------------------------|---------------------------|--------------------------------------------------------------------------|-----------------------------------------------------------------|-----------------------|-------------------------------------------------|----------------------------------|
| Thakar et al., 2011   | ✓                                    | ✓                                   | ✓                         | !                                                                        | ✓                                                               | ✓                     | ✓                                               | !                                |
| Harris et al., 2014   | ✓                                    | ✓                                   | ✓                         | ✓                                                                        | ✗                                                               | ✓                     | !                                               | ✗                                |
| Xie et al., 2014      | ✓                                    | ✗                                   | ✓                         | !                                                                        | ✓                                                               | ✓                     | ✓                                               | !                                |
| Warnock 2015          | ✓                                    | ✓                                   | ✓                         | ✓                                                                        | ✓                                                               | ✓                     | ✗                                               | ✓                                |
| Siew et al., 2016     | ✓                                    | ✓                                   | ✓                         | ✓                                                                        | ✓                                                               | ✓                     | ✓                                               | ✓                                |
| Kellum et al., 2017   | ✓                                    | ✓                                   | ✓                         | ✓                                                                        | ✓                                                               | ✓                     | ✓                                               | ✓                                |
| Rodrigo et al., 2017  | ✓                                    | ✓                                   | ✓                         | ✓                                                                        | ✓                                                               | ✓                     | ✓                                               | ✓                                |
| Valle et al., 2017    | ✓                                    | ✓                                   | ✓                         | ✓                                                                        | ✓                                                               | ✓                     | ✓                                               | ✓                                |
| Horne et al., 2017    | ✗                                    | ✓                                   | ✓                         | !                                                                        | ✓                                                               | ✓                     | ✓                                               | ✓                                |
| Rodriguez et al. 2018 | ✗                                    | ✓                                   | ✓                         | ✓                                                                        | ✗                                                               | ✓                     | ✓                                               | !                                |

*Green icon = low risk of bias. Yellow icon = unclear risk, red icon = high risk of bias.*

**Suppl. Table S3a. Risk factors associated with AKI recurrence within the same hospital admission. Only factors evaluated in at least 2 studies are shown here.**

| Publication Year | Author        | Study quality | Population | Number of AKI patients with recurrent AKI | Multivariable model | Risk factors for recurrent AKI within same hospital admission |                     |                                              |          |               |                                                      |              |
|------------------|---------------|---------------|------------|-------------------------------------------|---------------------|---------------------------------------------------------------|---------------------|----------------------------------------------|----------|---------------|------------------------------------------------------|--------------|
|                  |               |               |            |                                           |                     | Age                                                           | Lower baseline eGFR | Higher serum creatinine in first AKI episode | Diabetes | Heart disease | Acute Physiology and chronic health evaluation score | AKI severity |
| 2014             | Harris et al. | Poor          | ICU        | 68/296                                    | No                  | n.s                                                           |                     | n.s.                                         | n.s      |               | n.s.                                                 | n.s          |
| 2015             | Warnock et al | Good          | Hospital   | 2243/12101                                | yes                 | not reported                                                  |                     |                                              |          |               |                                                      |              |
| 2016             | Kellum et al  | Good          | ICU        | 3826/16968                                | yes                 | +                                                             |                     |                                              | +        | +             | +                                                    |              |
| 2017             | Rodrigo et al | Good          | ICU        | 79/331                                    | yes                 | +                                                             | +                   |                                              |          |               | +                                                    | +            |

Abbreviations: ICU: Intensive Care Unit, n.s = not significant, + = positively associated with increased risk of AKI recurrence.

**Suppl. Table S3b. Risk factors associated with AKI recurrence post discharge from hospital. Only factors evaluated in at least 2 studies are shown here.**

|                         |                        |                      |                   |                                                  | <b>Risk factors for recurrent AKI post-discharge</b> |            |                            |                                                     |                 |                      |                                                       |                     |
|-------------------------|------------------------|----------------------|-------------------|--------------------------------------------------|------------------------------------------------------|------------|----------------------------|-----------------------------------------------------|-----------------|----------------------|-------------------------------------------------------|---------------------|
| <b>Publication Year</b> | <b>Author</b>          | <b>Study quality</b> | <b>Population</b> | <b>Number of AKI patients with recurrent AKI</b> | <b>Multivariable model</b>                           | <b>Age</b> | <b>Lower baseline eGFR</b> | <b>Higher serum creatinine in first AKI episode</b> | <b>Diabetes</b> | <b>Heart disease</b> | <b>Acute Physiology and chronic health evaluation</b> | <b>AKI severity</b> |
| <b>2014</b>             | <b>Xie et al</b>       | <b>Fair</b>          | <b>Hospital</b>   | <b>70/170</b>                                    | yes                                                  |            |                            |                                                     | -               |                      |                                                       |                     |
| <b>2016</b>             | <b>Siew et al</b>      | <b>Good</b>          | <b>Hospital</b>   | <b>2954/11683</b>                                | yes                                                  |            | +                          |                                                     | +               | +                    |                                                       | +                   |
| <b>2017</b>             | <b>Valle et al</b>     | <b>Good</b>          | <b>PCI</b>        | <b>5365/39850</b>                                | yes                                                  |            |                            |                                                     |                 |                      |                                                       | +                   |
| <b>2018</b>             | <b>Rodriguez et al</b> | <b>Fair</b>          | <b>Hospital</b>   | <b>122/359</b>                                   | yes                                                  |            |                            | +                                                   | +               | +                    |                                                       |                     |

**Abbreviations: PCI: percutaneous coronary intervention, n.s = not significant, + = positively associated with increased risk of AKI recurrence, - = negatively associated with increased risk of AKI recurrence.**

**Suppl. Table S4. Risk factors associated with AKI recurrence (a) within the same hospital admission and (b) post discharge from hospital***(a)*

|                                                      | Harris et al., 2014 | Kellum et al., 2016 | Rodrigo et al., 2017 | Warnock et al., 2015 |
|------------------------------------------------------|---------------------|---------------------|----------------------|----------------------|
| Study quality                                        | Poor                | Good                | Good                 | Good                 |
| Number of AKI patients with recurrent AKI            | 68/296              | 3826/16968          | 79/331               | 2243/12101           |
| Population                                           | ICU                 | ICU                 | ICU                  | Hospital             |
| <i>Risk factor</i>                                   |                     |                     |                      |                      |
| Age                                                  | n.s                 | +                   | +                    | not reported         |
| Sex                                                  | n.s                 |                     |                      |                      |
| Duration of dialysis/ RRT                            | n.s                 |                     |                      |                      |
| Ethnicity                                            |                     | +                   |                      |                      |
| Lower baseline eGFR                                  |                     |                     | +                    |                      |
| Higher serum creatinine in first AKI episode         | n.s                 |                     |                      |                      |
| Lower mean albumin                                   |                     |                     |                      |                      |
| Acute rejection episode                              |                     |                     |                      |                      |
| Living related donor                                 |                     |                     |                      |                      |
| Deceased donor                                       |                     |                     |                      |                      |
| Diabetes                                             | n.s                 | +                   |                      |                      |
| Cardiac disease                                      |                     | +                   |                      |                      |
| Ischaemic heart disease                              |                     |                     |                      |                      |
| Acute coronary syndrome                              |                     |                     |                      |                      |
| Congestive heart failure                             |                     |                     |                      |                      |
| Coronary artery disease                              |                     |                     |                      |                      |
| Chronic kidney disease                               | n.s                 |                     |                      |                      |
| Hypertension                                         | n.s                 |                     |                      |                      |
| Advanced liver disease                               |                     |                     |                      |                      |
| Malignancy                                           |                     |                     |                      |                      |
| HIV                                                  |                     |                     |                      |                      |
| Dementia                                             |                     |                     |                      |                      |
| Acute Physiology and chronic health evaluation score | n.s                 | +                   | +                    |                      |
| Suspected sepsis                                     |                     | +                   |                      |                      |
| Mechanical ventilation                               |                     | +                   |                      |                      |
| Volume depletion                                     |                     |                     |                      |                      |
| Inpatient abdominal surgery                          |                     |                     |                      |                      |
| AKI on admission                                     | +                   |                     |                      |                      |
| AKI severity                                         | n.s                 |                     | +                    |                      |
| Post PCI AKI                                         |                     |                     |                      |                      |
| Lack of nephrology care                              |                     |                     |                      |                      |

**Abbreviations: ICU: Intensive Care Unit, n.s = not significant, + = positively associated with increased risk of AKI recurrence. Shaded rectangles indicate covariates included in multivariable models**

# Risk of recurrent acute kidney injury

(b)

|                                                         | Siew et al.,<br>2016 | Valle et al.,<br>2017 | Xie et al.,<br>2014 | Rodriguez et<br>al, 2018 |
|---------------------------------------------------------|----------------------|-----------------------|---------------------|--------------------------|
| Study quality                                           | Good                 | Good                  | Fair                | Fair                     |
| Number of AKI patients with<br>recurrent AKI            | 2954/11683           | 5365/39850            | 70/170              | 122/359                  |
| Population                                              | Hospital             | PCI                   | Hospital            | Hospital                 |
| <i>Risk factor</i>                                      |                      |                       |                     |                          |
| Age                                                     |                      |                       |                     |                          |
| Sex                                                     |                      |                       |                     |                          |
| Duration of dialysis/ RRT                               |                      |                       |                     |                          |
| Ethnicity                                               |                      |                       |                     |                          |
| Lower baseline eGFR                                     | +                    |                       |                     |                          |
| Higher serum creatinine in first AKI<br>episode         |                      |                       |                     | +                        |
| Lower mean albumin                                      | +                    |                       |                     |                          |
| Acute rejection episode                                 |                      |                       |                     |                          |
| Living related donor                                    |                      |                       |                     |                          |
| Deceased donor                                          |                      |                       |                     |                          |
| Diabetes                                                | +                    |                       | -                   | +                        |
| Cardiac disease                                         |                      |                       |                     |                          |
| Ischaemic heart disease                                 |                      |                       |                     | +                        |
| Acute coronary syndrome                                 | +                    |                       |                     |                          |
| Congestive heart failure                                | +                    |                       |                     |                          |
| Coronary artery disease                                 | +                    |                       |                     |                          |
| Chronic kidney disease                                  |                      |                       |                     |                          |
| Hypertension                                            |                      |                       |                     |                          |
| Advanced liver disease                                  | +                    |                       |                     |                          |
| Malignancy                                              | +                    |                       |                     |                          |
| HIV                                                     | +                    |                       |                     |                          |
| Dementia                                                | +                    |                       |                     |                          |
| Acute Physiology and chronic health<br>evaluation score |                      |                       |                     |                          |
| Suspected sepsis                                        |                      |                       |                     |                          |
| Mechanical ventilation                                  |                      |                       |                     |                          |
| Volume depletion                                        | +                    |                       |                     |                          |
| Inpatient abdominal surgery                             | -                    |                       |                     |                          |
| AKI on admission                                        |                      |                       |                     |                          |
| AKI severity                                            | +                    | +                     |                     |                          |
| Post PCI AKI                                            |                      | +                     |                     |                          |
| Lack of nephrology follow up care                       |                      |                       | +                   |                          |

**Abbreviations: PCI: percutaneous coronary intervention, + = positively associated with increased risk of AKI recurrence, - = negatively associated with increased risk of AKI recurrence. Shaded rectangles indicate covariates included in multivariable models.**

*Horne & Thakar omitted as these papers did not assess risk factors for recurrence.*
